# Supplementary material for: Exploring the Impact of Flavonoids on Symptoms of Depression: A Systematic Review and Meta-Analysis
Source: MDPI journal article supplement (doi:10.3390/antiox10111644), 2021-10-20
Supplement: s1 [file s1]

Supplementary Table S1.

Quality assessment of included observational studies using the New-Castle Ottawa Scale

|                          | SELECTION                                |                                   |                           |                                                                                      | COMPARABILITY                                                   | OUTCOME               |                                                  |                                  | Total |
|--------------------------|------------------------------------------|-----------------------------------|---------------------------|--------------------------------------------------------------------------------------|-----------------------------------------------------------------|-----------------------|--------------------------------------------------|----------------------------------|-------|
|                          | Representativeness of the exposed cohort | Selection of the unexposed cohort | Ascertainment of exposure | Demonstration that the outcome of interest was not present at the start of the study | Comparability of cohorts on the basis of the design or analysis | Assessment of outcome | Was follow-up long enough for outcomes to occur? | Adequacy of follow-up of cohorts |       |
| Hakim et al. 2016        | *                                        |                                   | *                         | *                                                                                    | **                                                              |                       | *                                                |                                  | 6     |
| Chang et al et al., 2016 | *                                        |                                   | *                         | *                                                                                    | **                                                              | *                     | *                                                | *                                | 8     |
| Cui et al., 2020         |                                          |                                   | *                         |                                                                                      | **                                                              |                       |                                                  |                                  | 3     |
| Godos et al., 2018       | *                                        |                                   | *                         |                                                                                      | **                                                              |                       |                                                  |                                  | 4     |
| Miyake et al., 2018      | *                                        |                                   | *                         |                                                                                      | **                                                              |                       |                                                  |                                  | 4     |
| Miyake et al., 2018      | *                                        |                                   | *                         |                                                                                      | **                                                              |                       |                                                  |                                  | 4     |
| Nagata et al., 1999      | *                                        |                                   | *                         |                                                                                      | **                                                              |                       |                                                  |                                  | 4     |
| Richard et al., 2014     | *                                        |                                   | *                         |                                                                                      | **                                                              |                       |                                                  |                                  | 4     |
| Rosli et al., 2019       | *                                        |                                   | *                         |                                                                                      | **                                                              |                       |                                                  |                                  | 4     |
| Woo et al., 2006         | *                                        |                                   | *                         |                                                                                      | **                                                              | *                     |                                                  |                                  | 5     |

<sup>1</sup>NOS high-quality choices are identified with a star. A maximum of 1 star is applied for each item within the Selection and Outcome categories, and a maximum of 2 stars for Comparability. NOS, Newcastle-Ottawa Scale; ref, reference.
